# Supplementary material for: Patterns of multidisciplinary care in the management of non-metastatic invasive breast cancer in the United States Medicare patient
Source: Springer Nature journal article supplement (doi:10.1007/s10549-016-3982-x), 2016-09-17
Supplement: MOESM1 [file 10710352]

**Supplemental Online-Only Material**

**Supplemental Figure 1.** Survival data. For patients undergoing MDC: Overall survival HR=0.86, 95% CI 0.73-1.02, p=0.092, cause specific survival: sHR=0.80, 95% CI 0.63-1.02, p=0.073. For patients having MDCSD: Overall survival HR=0.57, 95% CI 0.29-1.12, p=0.101, disease-specific survival: sHR=1.06, 95% CI 0.28-4.07, p=0.934.


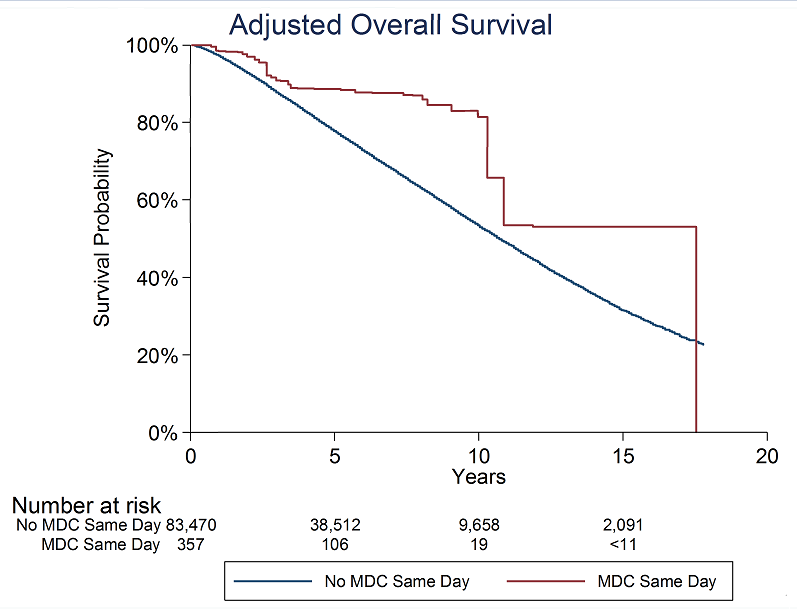


| **Supplemental Table 1.** List of line HCFA specialty codes to identify provider type. | | |
| --- | --- | --- |
| Medical Specialty Code | Medical Provider |  |
| 02 | General Surgery |  |
| 91 | Surgical Oncology |  |
| 90 | Medical Oncology |  |
| 83 | Hematology Oncology |  |
| 92 | Radiation Oncology |  |
| 32 | Radiation Oncology |  |

| **Supplemental Table 2.** List of Current Procedural Terminology (CPT) codes for provider encounter type. | |
| --- | --- |
| CPT | Provider Encounter Type |
| 99241 | Office Consult - Level 1 |
| 99242 | Office Consult - Level 2 |
| 99243 | Office Consult - Level 3 |
| 99244 | Office Consult - Level 4 |
| 99245 | Office Consult - Level 5 |
| 99201 | New Office Visit - Level 1 |
| 99202 | New Office Visit - Level 2 |
| 99203 | New Office Visit - Level 3 |
| 99204 | New Office Visit - Level 4 |
| 99205 | New Office Visit - Level 5 |
| 99211 | Office Follow up - Level 1 |
| 99212 | Office Follow up - Level 2 |
| 99213 | Office Follow up - Level 3 |
| 99214 | Office Follow up - Level 4 |
| 99215 | Office Follow up - Level 5 |

| **Supplemental Table 3.** List of Current Procedural Terminology (CPT), International Classification of Diseases (ICD-9) and revenue center codes for treatment quality metrics. | | | |
| --- | --- | --- | --- |
| Quality Metric Type | CPT | ICD-9 | Revenue Center Codes |
| Chemotherapy | "96400", "96401", "96402", "96405", "96406", "96408", "96409", "96410", "96411", "96412", "96413", "96414", "96415", "96416", "96417", "96420", "96422", "96423", "96425", "96440", "96445", "96450", "96520", "96521", "96522", "96523", "96530", "96542", "96545", "96549", "99601", "99602", "Q0083", "Q0084", "Q0085", "G0355", "G0356", "G0357", "G0358", "G0359", "G0360", "G0361", "G0362", "G0363", "G9021", "G9022", "G9023", "G9024", "G9025", "G9026", "G9027", "G9028", "G9029", "G9030", "G9031", "G9032", "J0897", "J2430", "J3487", "J3488", "J8510", "J8520", "J8521", "J8530", "J8560", "J8561", "J8562", "J8610", "J8999", "J9000", "J9001", "J9035", "J9045", "J9060", "J9062", "J9070", "J9080", "J9090", "J9091", "J9092", "J9093", "J9094", "J9095", "J9096", "J9097", "J9150", "J9151", "J9165", "J9170", "J9171", "J9178", "J9179", "J9181", "J9182", "J9190", "J9201", "J9202", "J9206", "J9207", "J9211", "J9217", "J9218", "J9219", "J9250", "J9260", "J9264", "J9265", "J9280", "J9290", "J9291", "J9293", "J9328", "J9340", "J9355", "J9390", "J9395", "J9999" | "99.25","V5811", "V672", "V662", "V581" | "0331", "0332", "0335" |
| Radiotherapy | "77401", "77402", "77403", "77404", "77406", "77407", "77408", "77409", "77411", "77412", "77413", "77414", "77416", "77417", "77418", "77427", "77431", "77470", "77499", "77520", "77522", "77523", "77525", "77750", "77761", "77762", "77763", "77776", "77777", "77778", "77781", "77782", "77783", "77784", "77789", "77790", "77799" | "92.2", "92.20", "92.22", "92.27","92.28","92.29","92.4", "92.41", "92.40","V580", "V661", "V671" | "0330", "0333" |
| Mastectomy | "19180", "19303", "19182", "19304", "19240", "19307", "19220", "19305", "19200", "19306", "19162", "19302" | "85.40", "85.41", "85.42", "85.34", "85.36", "85.4","85.45", "85.46", "8547", "85.48", "85.43", "85.44" |  |
| Lumpectomy | "19160", "19301", "19125", "19126", "19120" | "85.23", "85.21", "85.22", "85.25", "85.2","85.20","85.24" |  |
| Lymph Node Excision | "38500", "38525", "38530" | "40.23", "40.22", "40.3", "40.11", "40.29", "40.30" |  |
| Axillary Lymph Node Dissection | "38740", "38745" | "40.50", "40.5", "40.51" |  |
| Sentinel node (dye) | "38792", "38900" | "85.19", "40.19" |  |
| Sentinel node (radiotracer) | "38790", "78195" | "92.16" |  |
